# Supplementary material for: Characterization of Dnmt1 Binding and DNA Methylation on Nucleosomes and Nucleosomal Arrays
Source: PLOS journal article supplement (doi:10.1371/journal.pone.0140076), 2015-10-23
Supplement: S4 (10.1371/journal.pone.0140076.s004) [file journal.pone.0140076.s004]

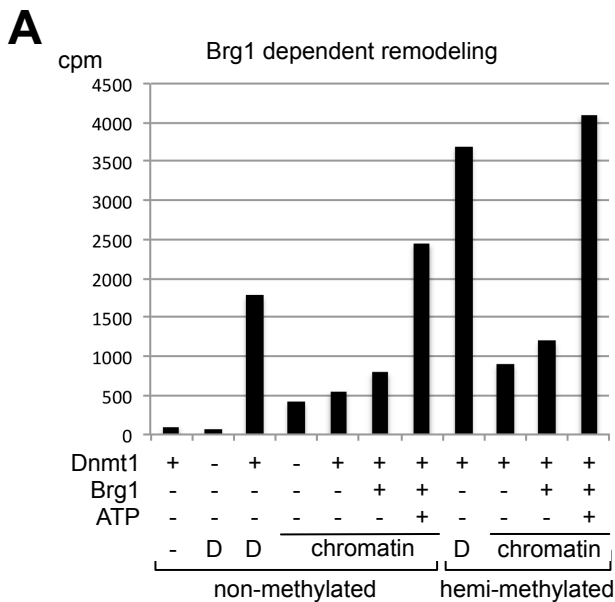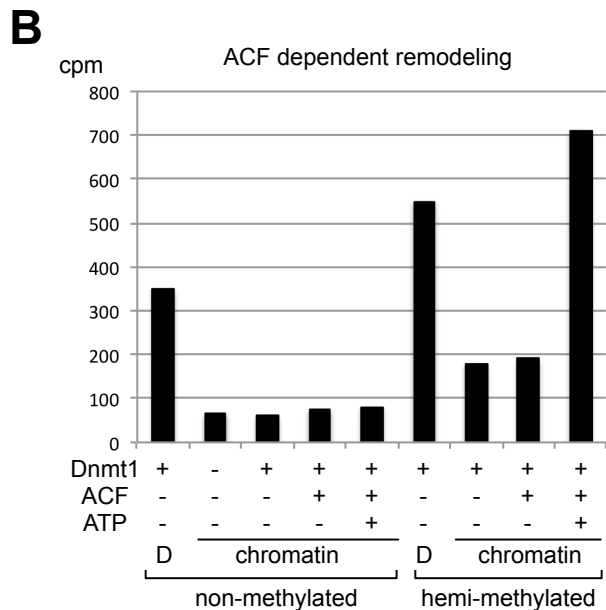

**S4 Fig. Analysis of Dnmt1 methyltransferase activity on nucleosomal arrays in the context of chromatin remodeling.** Non-methylated or hemi-methylated free DNA or nucleosomal arrays were incubated with Dnmt1, ATP, Brg1 and ACF as indicated. The incorporation of [ $^3\text{H}$ ]-labeled  $\text{CH}_3$  was determined by scintillation counting. (D = free DNA). (A) Brg1 increases the DNA methylation efficiency on the non - and hemi-methylated nucleosomal substrate. (B) ACF stimulates DNA methylation only on hemi-methylated nucleosomal arrays.
